# Supplementary material for: Efficacy and short-term side effects of sitagliptin, vildagliptin and saxagliptin in Chinese diabetes: a randomized clinical trial
Source: PubMed Central journal article supplement — Endocr Connect. 2019 Mar 1;8(4):318–25. doi: 10.1530/EC-18-0523 (PMC6432871; doi:10.1530/ec-18-0523), 2019-03-01
Supplement: supplementary_table_1.pdf [file supplementary_table_1.pdf]

**Supplementary Table 1: Demographic characteristics of study participants at week 12.**

|                          | <b>Sitagliptin</b> | <b>Vildagliptin</b> | <b>Saxagliptin</b> | <b><i>P</i> value</b> |
|--------------------------|--------------------|---------------------|--------------------|-----------------------|
|                          | <b>N=93</b>        | <b>N=94</b>         | <b>N=90</b>        |                       |
| BMI (kg/m <sup>2</sup> ) | 26.8±4.0           | 26.3±3.1            | 27.1±2.6           | 0.89                  |
| TC (mmol/L)              | 5.1 (4.6-5.5)      | 5.1 (4.3-5.7)       | 4.6 (4.2-5.4)      | 0.36                  |
| LDL-C (mmol/L)           | 3.3±0.6            | 3.1±0.7             | 3.1±0.7            | 0.40                  |
| HDL-C (mmol/L)           | 1.2±0.3            | 1.2±0.3             | 1.3±1.0            | 0.87                  |
| FPG(mmol/L)              | 7.7±1.3            | 8.1±2.7             | 7.7±2.8            | 0.82                  |
| PPG(mmol/L)              | 13.3±4.8           | 12.3±4.4            | 11.6±4.6           | 0.49                  |
| HbA1c (%)                | 6.50 (6.30-7.10)   | 6.50 (6.20-7.10)    | 6.60 (6.20-6.90)   | 0.99                  |
| ALT(IU/L)                | 17.5 (14.0-28.5)   | 19.5 (16.8-29.2)    | 20.0 (16.0-24.0)   | 0.46                  |
| AST(IU/L)                | 16.0 (14.0-21.0)   | 19.9 (15.0-24.7)    | 17.0 (15.0-19.5)   | 0.21                  |
| Cr(umol/L)               | 65.3±13.8          | 66.4±13.4           | 65.8±11.7          | 0.95                  |

|                         |           |           |           |      |
|-------------------------|-----------|-----------|-----------|------|
| BIL(umol/L)             | 13.5±5.0  | 13.1±4.3  | 15.0±6.7  | 0.41 |
| WBC(10 <sup>9</sup> /L) | 6.58±2.11 | 6.87±1.46 | 6.60±2.11 | 0.86 |

Note: Data were means ± SD or medians (interquartile ranges) for skewed variables or numbers (proportions) for categorical variables.

P value was calculated for Chi-square test across the three groups.

BMI, body mass index; FPG, fasting plasma glucose; HbA1c, Hemoglobin A1c; TC, total cholesterol; HDL-C, high-density lipoprotein cholesterol; LDL-C, low-density lipoprotein cholesterol.
