# Supplementary figures and images for: Efficacy and short-term side effects of sitagliptin, vildagliptin and saxagliptin in Chinese diabetes: a randomized clinical trial
Source: PubMed Central journal article supplement — Endocr Connect. 2019 Mar 1;8(4):318–25. doi: 10.1530/EC-18-0523 (PMC6432871; doi:10.1530/ec-18-0523), 2019-03-01

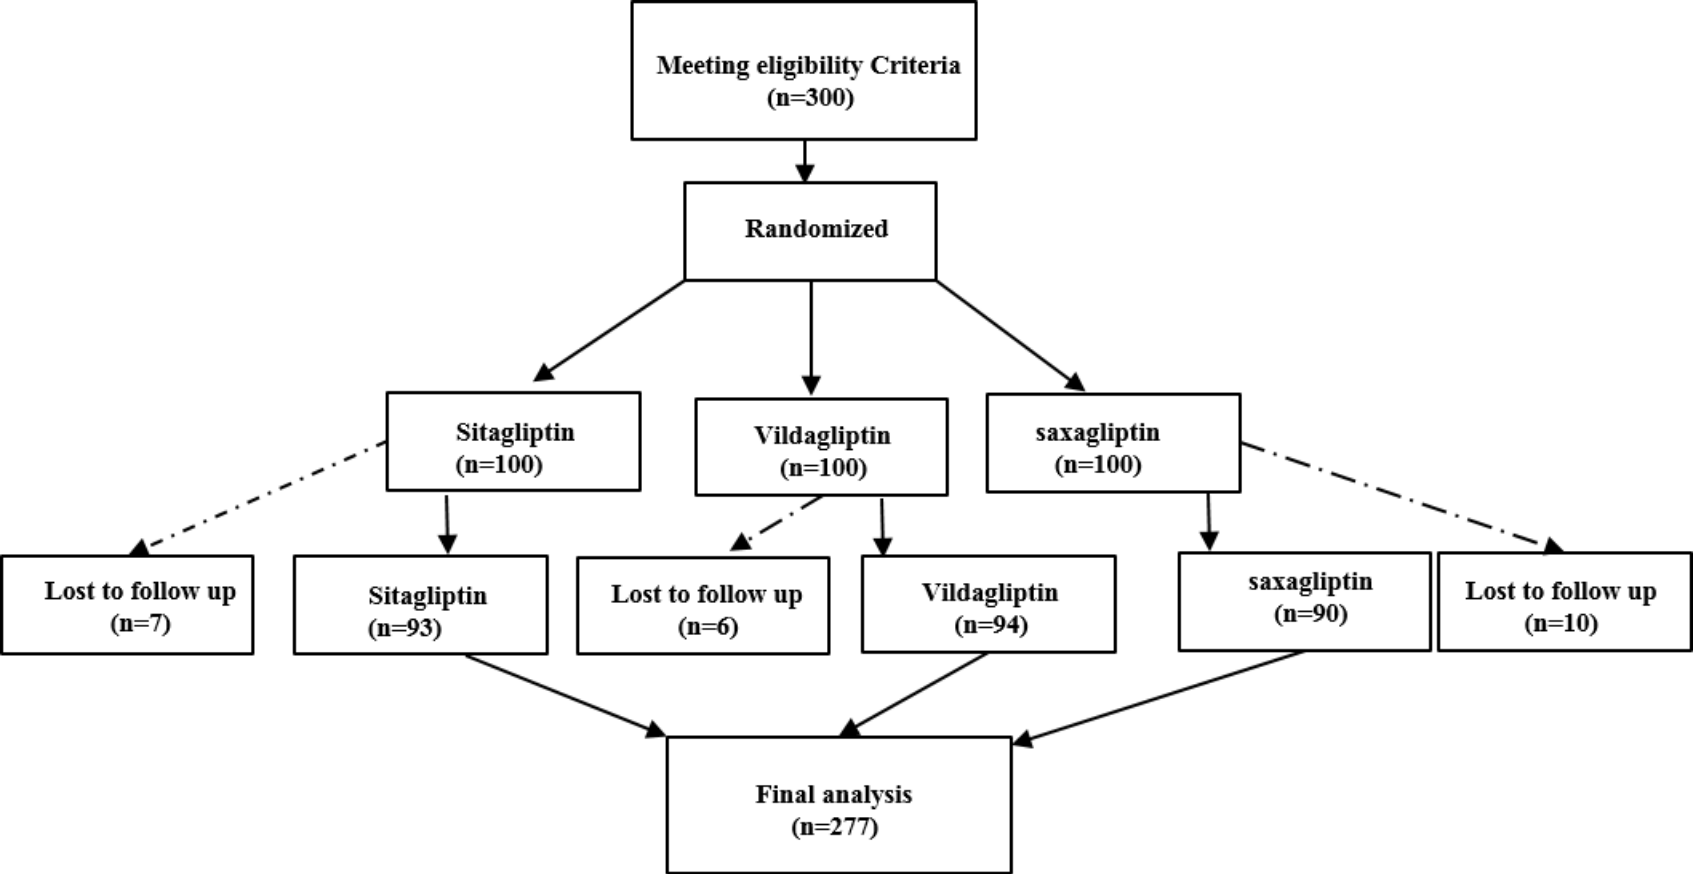

Supplement: supplementary_figure_1.pdf [file supplementary_figure_1.pdf]
